# Supplementary material for: Transitions in climate and energy discourse between Hurricanes Katrina and Sandy
Source: Springer Nature journal article supplement (doi:10.1007/s13412-016-0391-8), 2016-04-21
Supplement: MOESM1 [file 13412_2016_391_MOESM1_ESM.pdf]

## Supplementary Materials

**Table 5** Results of LSA for Hurricane Katrina for 3 different queries. Words are ordered based on their cosine distance from the query vector. Includes the 100 words most similar to the query.

| Hurricane Katrina LSA |                 |            |                 |            |                   |            |     |               |       |                |       |
|-----------------------|-----------------|------------|-----------------|------------|-------------------|------------|-----|---------------|-------|----------------|-------|
|                       | "climate"       | Similarity | "energy"        | Similarity | "climate, energy" | Similarity |     |               |       |                |       |
| 1                     | climate         | 1.000      | energy          | 1.000      | energy            | 0.979      | 51  | supposedly    | 0.746 | conocophillips | 0.929 |
| 2                     | larger          | 0.866      | prices          | 0.986      | prices            | 0.952      | 52  | boogie        | 0.746 | jumped         | 0.928 |
| 3                     | destroy         | 0.861      | exchange        | 0.968      | deutsche          | 0.945      | 53  | theories      | 0.746 | citroen        | 0.927 |
| 4                     | formally        | 0.848      | consumers       | 0.966      | price             | 0.943      | 54  | nurtured      | 0.745 | tumbling       | 0.926 |
| 5                     | theory          | 0.844      | weinberg        | 0.966      | underinvestment   | 0.943      | 55  | raw           | 0.745 | mercantile     | 0.925 |
| 6                     | sound           | 0.837      | argus           | 0.964      | signaling         | 0.941      | 56  | topics        | 0.744 | production     | 0.924 |
| 7                     | gale            | 0.826      | reidy           | 0.962      | discounting       | 0.940      | 57  | sounded       | 0.743 | embargo        | 0.923 |
| 8                     | reinforced      | 0.817      | splurge         | 0.960      | java              | 0.940      | 58  | cynthia       | 0.742 | putins         | 0.922 |
| 9                     | journal         | 0.815      | hummer          | 0.960      | argus             | 0.939      | 59  | deadly        | 0.742 | shutdowns      | 0.920 |
| 10                    | sensitive       | 0.814      | markets         | 0.959      | hummer            | 0.938      | 60  | sacrifice     | 0.741 | reserve        | 0.920 |
| 11                    | unlikely        | 0.812      | downers         | 0.958      | oil               | 0.937      | 61  | certain       | 0.740 | crude          | 0.920 |
| 12                    | belief          | 0.809      | highs           | 0.958      | consumers         | 0.937      | 62  | cataclysmic   | 0.740 | arabica        | 0.920 |
| 13                    | phenomenon      | 0.809      | underinvestment | 0.957      | shocks            | 0.934      | 63  | nor           | 0.740 | pretax         | 0.919 |
| 14                    | rail            | 0.800      | exporting       | 0.954      | weinberg          | 0.934      | 64  | reconstructed | 0.739 | mobil          | 0.919 |
| 15                    | studying        | 0.796      | price           | 0.954      | markets           | 0.934      | 65  | assessments   | 0.739 | soaring        | 0.919 |
| 16                    | wealthy         | 0.795      | reserves        | 0.954      | profits           | 0.931      | 66  | haunting      | 0.738 | uncharted      | 0.919 |
| 17                    | brings          | 0.792      | signaling       | 0.953      | reserves          | 0.931      | 67  | continuing    | 0.737 | imports        | 0.919 |
| 18                    | barge           | 0.792      | dampening       | 0.950      | exchange          | 0.931      | 68  | transforming  | 0.737 | chevrons       | 0.919 |
| 19                    | ancient         | 0.791      | oil             | 0.950      | peaks             | 0.931      | 69  | william       | 0.737 | exxon          | 0.917 |
| 20                    | masters         | 0.786      | java            | 0.949      | highs             | 0.929      | 70  | regard        | 0.736 | manifold       | 0.917 |
| 21                    | politicians     | 0.785      | cents           | 0.948      | splurge           | 0.927      | 71  | vicinity      | 0.736 | trading        | 0.916 |
| 22                    | professor       | 0.783      | deutsche        | 0.948      | exporting         | 0.927      | 72  | booming       | 0.735 | suisse         | 0.916 |
| 23                    | recommendations | 0.782      | gasoline        | 0.947      | gasoline          | 0.923      | 73  | audiences     | 0.735 | automaker      | 0.916 |
| 24                    | thick           | 0.782      | traders         | 0.946      | dampening         | 0.923      | 74  | advocacy      | 0.734 | tepid          | 0.915 |
| 25                    | marked          | 0.780      | nariman         | 0.946      | pinch             | 0.922      | 75  | mass          | 0.733 | futures        | 0.915 |
| 26                    | alter           | 0.779      | discounting     | 0.945      | oils              | 0.922      | 76  | remarkable    | 0.733 | geopolitical   | 0.915 |
| 27                    | sounds          | 0.776      | behavesh        | 0.944      | soaring           | 0.922      | 77  | breaking      | 0.732 | record         | 0.914 |
| 28                    | hole            | 0.776      | retailers       | 0.943      | exported          | 0.920      | 78  | facts         | 0.732 | yergin         | 0.914 |
| 29                    | peril           | 0.775      | barrel          | 0.942      | reidy             | 0.919      | 79  | constituents  | 0.731 | clamping       | 0.914 |
| 30                    | extremely       | 0.771      | heating         | 0.942      | output            | 0.919      | 80  | isolated      | 0.730 | retail         | 0.914 |
| 31                    | avoided         | 0.770      | oils            | 0.942      | exporter          | 0.917      | 81  | vibrant       | 0.703 | hess           | 0.913 |
| 32                    | loose           | 0.770      | shocks          | 0.941      | easing            | 0.917      | 82  | unequivocal   | 0.730 | pinch          | 0.912 |
| 33                    | multi           | 0.769      | idled           | 0.941      | putins            | 0.917      | 83  | recommended   | 0.729 | chairmans      | 0.911 |
| 34                    | appear          | 0.767      | jolted          | 0.941      | record            | 0.916      | 84  | unprotected   | 0.728 | closings       | 0.911 |
| 35                    | devastating     | 0.766      | output          | 0.940      | tumbling          | 0.916      | 85  | inundated     | 0.727 | depository     | 0.910 |
| 36                    | draft           | 0.764      | peaks           | 0.937      | demand            | 0.915      | 86  | ears          | 0.726 | disrupted      | 0.909 |
| 37                    | possibility     | 0.764      | profits         | 0.936      | downers           | 0.915      | 87  | exuberant     | 0.725 | winter         | 0.909 |
| 38                    | rolled          | 0.759      | soared          | 0.936      | automaker         | 0.913      | 88  | greenhouse    | 0.725 | sunoco         | 0.909 |
| 39                    | retracted       | 0.758      | exported        | 0.936      | heating           | 0.913      | 89  | powers        | 0.725 | chevron        | 0.908 |
| 40                    | mismanagement   | 0.758      | premcot         | 0.935      | disruptions       | 0.913      | 90  | alarms        | 0.724 | doha           | 0.908 |
| 41                    | plot            | 0.757      | disruptions     | 0.934      | atm               | 0.911      | 91  | comment       | 0.723 | bros           | 0.907 |
| 42                    | produced        | 0.757      | exporter        | 0.934      | tepid             | 0.911      | 92  | brokers       | 0.722 | commodity      | 0.907 |
| 43                    | becomes         | 0.755      | easing          | 0.933      | chevrons          | 0.911      | 93  | deny          | 0.722 | commodities    | 0.906 |
| 44                    | decades         | 0.753      | crimp           | 0.932      | jolted            | 0.911      | 94  | pianos        | 0.722 | wholesalers    | 0.905 |
| 45                    | consider        | 0.752      | dent            | 0.932      | embargo           | 0.909      | 95  | baker         | 0.721 | refiner        | 0.905 |
| 46                    | wealthier       | 0.752      | demand          | 0.932      | pricing           | 0.909      | 96  | ethnic        | 0.720 | soar           | 0.903 |
| 47                    | dismissed       | 0.751      | roasters        | 0.930      | roasters          | 0.908      | 97  | cyclical      | 0.720 | analyst        | 0.903 |
| 48                    | repeated        | 0.751      | tightness       | 0.930      | dent              | 0.908      | 98  | relieve       | 0.720 | products       | 0.903 |
| 49                    | delays          | 0.750      | atm             | 0.929      | production        | 0.908      | 99  | studies       | 0.720 | bps            | 0.903 |
| 50                    | unique          | 0.749      | pricing         | 0.929      | barrel            | 0.908      | 100 | spread        | 0.720 | thurtell       | 0.902 |
|                       |                 |            |                 |            |                   |            |     |               |       | retailers      | 0.908 |
|                       |                 |            |                 |            |                   |            |     |               |       | citroen        | 0.907 |
|                       |                 |            |                 |            |                   |            |     |               |       | behavesh       | 0.907 |
|                       |                 |            |                 |            |                   |            |     |               |       | traders        | 0.906 |
|                       |                 |            |                 |            |                   |            |     |               |       | producers      | 0.905 |
|                       |                 |            |                 |            |                   |            |     |               |       | idled          | 0.905 |
|                       |                 |            |                 |            |                   |            |     |               |       | products       | 0.905 |
|                       |                 |            |                 |            |                   |            |     |               |       | tenth          | 0.904 |
|                       |                 |            |                 |            |                   |            |     |               |       | export         | 0.904 |
|                       |                 |            |                 |            |                   |            |     |               |       | commodity      | 0.904 |
|                       |                 |            |                 |            |                   |            |     |               |       | imports        | 0.903 |
|                       |                 |            |                 |            |                   |            |     |               |       | adjusting      | 0.903 |
|                       |                 |            |                 |            |                   |            |     |               |       | yergin         | 0.902 |
|                       |                 |            |                 |            |                   |            |     |               |       | artificially   | 0.902 |
|                       |                 |            |                 |            |                   |            |     |               |       | nariman        | 0.902 |
|                       |                 |            |                 |            |                   |            |     |               |       | cents          | 0.902 |
|                       |                 |            |                 |            |                   |            |     |               |       | tightness      | 0.902 |
|                       |                 |            |                 |            |                   |            |     |               |       | subjective     | 0.902 |
|                       |                 |            |                 |            |                   |            |     |               |       | doha           | 0.901 |
|                       |                 |            |                 |            |                   |            |     |               |       | spikes         | 0.900 |
|                       |                 |            |                 |            |                   |            |     |               |       | winter         | 0.898 |
|                       |                 |            |                 |            |                   |            |     |               |       | exxon          | 0.897 |
|                       |                 |            |                 |            |                   |            |     |               |       | uncharted      | 0.897 |
|                       |                 |            |                 |            |                   |            |     |               |       | chairmans      | 0.897 |
|                       |                 |            |                 |            |                   |            |     |               |       | soared         | 0.897 |
|                       |                 |            |                 |            |                   |            |     |               |       | conocophillips | 0.896 |
|                       |                 |            |                 |            |                   |            |     |               |       | clamping       | 0.895 |
|                       |                 |            |                 |            |                   |            |     |               |       | exporters      | 0.895 |
|                       |                 |            |                 |            |                   |            |     |               |       | bps            | 0.895 |
|                       |                 |            |                 |            |                   |            |     |               |       | crimp          | 0.895 |
|                       |                 |            |                 |            |                   |            |     |               |       | cutback        | 0.894 |
|                       |                 |            |                 |            |                   |            |     |               |       | global         | 0.894 |
|                       |                 |            |                 |            |                   |            |     |               |       | pretax         | 0.893 |
|                       |                 |            |                 |            |                   |            |     |               |       | disrupted      | 0.893 |
|                       |                 |            |                 |            |                   |            |     |               |       | liquefied      | 0.892 |
|                       |                 |            |                 |            |                   |            |     |               |       | premcot        | 0.892 |
|                       |                 |            |                 |            |                   |            |     |               |       | jumped         | 0.891 |
|                       |                 |            |                 |            |                   |            |     |               |       | moil           | 0.891 |
|                       |                 |            |                 |            |                   |            |     |               |       | arabica        | 0.890 |
|                       |                 |            |                 |            |                   |            |     |               |       | bros           | 0.890 |
|                       |                 |            |                 |            |                   |            |     |               |       | mercantile     | 0.890 |
|                       |                 |            |                 |            |                   |            |     |               |       | analyst        | 0.887 |
|                       |                 |            |                 |            |                   |            |     |               |       | gas            | 0.887 |
|                       |                 |            |                 |            |                   |            |     |               |       | geopolitical   | 0.886 |
|                       |                 |            |                 |            |                   |            |     |               |       | interruptions  | 0.886 |
|                       |                 |            |                 |            |                   |            |     |               |       | squeeze        | 0.886 |
|                       |                 |            |                 |            |                   |            |     |               |       | chevron        | 0.885 |
|                       |                 |            |                 |            |                   |            |     |               |       | crude          | 0.885 |
|                       |                 |            |                 |            |                   |            |     |               |       | nations        | 0.884 |
|                       |                 |            |                 |            |                   |            |     |               |       | derivatives    | 0.884 |

**Table 6** Results of LSA for Hurricane Sandy for 3 different queries. Words are ordered based on their cosine distance from the query vector. Includes the 100 words most similar to the query.

| Hurricane Sandy LSA |               |            |               |            |                   |            |     |               |            |              |            |                   |            |
|---------------------|---------------|------------|---------------|------------|-------------------|------------|-----|---------------|------------|--------------|------------|-------------------|------------|
|                     | "climate"     | Similarity | "energy"      | Similarity | "climate, energy" | Similarity |     | "climate"     | Similarity | "energy"     | Similarity | "climate, energy" | Similarity |
| 1                   | climate       | 1.000      | energy        | 1.000      | climate           | 0.979      | 51  | fuels         | 0.895      | extracted    | 0.862      | deniers           | 0.906      |
| 2                   | change        | 0.963      | technologies  | 0.949      | warmer            | 0.961      | 52  | kerry         | 0.894      | abundance    | 0.860      | vigil             | 0.904      |
| 3                   | reduce        | 0.957      | fuels         | 0.946      | georgetown        | 0.956      | 53  | hydroelectric | 0.893      | tackle       | 0.860      | proportion        | 0.904      |
| 4                   | warming       | 0.957      | fossil        | 0.943      | warming           | 0.955      | 54  | pollute       | 0.893      | regulating   | 0.858      | targets           | 0.902      |
| 5                   | reducing      | 0.956      | hydroelectric | 0.936      | reduce            | 0.955      | 55  | technologies  | 0.891      | outweigh     | 0.858      | mover             | 0.901      |
| 6                   | pressures     | 0.952      | renewable     | 0.932      | energy            | 0.952      | 56  | altering      | 0.890      | envisioned   | 0.857      | scientists        | 0.899      |
| 7                   | georgetown    | 0.947      | rogue         | 0.932      | reducing          | 0.951      | 57  | regulating    | 0.890      | miserably    | 0.856      | automobiles       | 0.899      |
| 8                   | lowering      | 0.943      | employing     | 0.921      | pressures         | 0.948      | 58  | mover         | 0.889      | subtler      | 0.856      | devise            | 0.898      |
| 9                   | talks         | 0.942      | warmer        | 0.920      | fossil            | 0.947      | 59  | believing     | 0.886      | upending     | 0.855      | controlling       | 0.898      |
| 10                  | devise        | 0.938      | supplying     | 0.918      | fuels             | 0.946      | 60  | enhancement   | 0.885      | pollution    | 0.855      | modification      | 0.896      |
| 11                  | expands       | 0.938      | firing        | 0.913      | change            | 0.946      | 61  | planets       | 0.885      | solar        | 0.855      | trillions         | 0.895      |
| 12                  | outweigh      | 0.937      | efficiency    | 0.911      | technologies      | 0.945      | 62  | eco           | 0.883      | modification | 0.855      | scenarios         | 0.893      |
| 13                  | warmer        | 0.937      | streamlined   | 0.911      | coal              | 0.943      | 63  | cities        | 0.882      | sciences     | 0.854      | earths            | 0.893      |
| 14                  | plants        | 0.934      | generating    | 0.908      | global            | 0.942      | 64  | automobiles   | 0.882      | automobiles  | 0.853      | abundance         | 0.891      |
| 15                  | drought       | 0.933      | altering      | 0.906      | hydroelectric     | 0.941      | 65  | greenhouse    | 0.880      | regulatory   | 0.852      | attribute         | 0.890      |
| 16                  | manipulation  | 0.929      | coal          | 0.906      | emissions         | 0.940      | 66  | notoriously   | 0.879      | trapping     | 0.851      | greenhouse        | 0.888      |
| 17                  | emissions     | 0.929      | consumption   | 0.900      | firing            | 0.937      | 67  | strict        | 0.878      | surprises    | 0.850      | enhancement       | 0.887      |
| 18                  | global        | 0.929      | adapt         | 0.898      | outweigh          | 0.936      | 68  | porous        | 0.878      | earths       | 0.849      | doom              | 0.886      |
| 19                  | imperative    | 0.927      | sparked       | 0.895      | generating        | 0.933      | 69  | groundwater   | 0.878      | measured     | 0.848      | funneling         | 0.885      |
| 20                  | arizona       | 0.924      | dimming       | 0.894      | carbon            | 0.930      | 70  | consumption   | 0.877      | mover        | 0.847      | groundwater       | 0.885      |
| 21                  | attribute     | 0.923      | georgetown    | 0.892      | arizona           | 0.930      | 71  | modification  | 0.876      | waterkeeper  | 0.846      | hotter            | 0.884      |
| 22                  | scientists    | 0.923      | carbon        | 0.889      | editorials        | 0.929      | 72  | hotter        | 0.876      | change       | 0.845      | copenhagen        | 0.884      |
| 23                  | planet        | 0.920      | masonry       | 0.888      | plants            | 0.927      | 73  | earths        | 0.875      | deniers      | 0.843      | oceans            | 0.883      |
| 24                  | pollution     | 0.919      | global        | 0.886      | humanitys         | 0.926      | 74  | markedly      | 0.875      | sub          | 0.843      | windstorms        | 0.883      |
| 25                  | curbing       | 0.918      | erratic       | 0.885      | altering          | 0.926      | 75  | retaining     | 0.875      | blackouts    | 0.843      | planets           | 0.881      |
| 26                  | coal          | 0.917      | searchable    | 0.884      | manipulation      | 0.924      | 76  | attests       | 0.875      | manipulation | 0.842      | emission          | 0.881      |
| 27                  | editorials    | 0.915      | faster        | 0.882      | pollution         | 0.923      | 77  | dimming       | 0.875      | depleting    | 0.841      | munich            | 0.881      |
| 28                  | targets       | 0.914      | emissions     | 0.881      | employing         | 0.923      | 78  | employing     | 0.874      | funneling    | 0.841      | rogue             | 0.880      |
| 29                  | oceans        | 0.912      | skeptics      | 0.880      | drought           | 0.922      | 79  | proportion    | 0.873      | curbing      | 0.841      | markedly          | 0.878      |
| 30                  | vigil         | 0.912      | proportion    | 0.877      | extracted         | 0.921      | 80  | efficiency    | 0.873      | plants       | 0.841      | pollute           | 0.878      |
| 31                  | scenarios     | 0.911      | trillions     | 0.876      | foretaste         | 0.920      | 81  | depleted      | 0.873      | sources      | 0.841      | ozone             | 0.878      |
| 32                  | extracted     | 0.911      | foretaste     | 0.876      | skeptics          | 0.919      | 82  | exemplified   | 0.872      | frequent     | 0.841      | depleting         | 0.877      |
| 33                  | humanitys     | 0.911      | warming       | 0.875      | lowering          | 0.919      | 83  | murky         | 0.872      | oil          | 0.841      | epa               | 0.877      |
| 34                  | distraction   | 0.910      | reduce        | 0.875      | dioxide           | 0.918      | 84  | sparked       | 0.870      | planet       | 0.839      | overheated        | 0.877      |
| 35                  | pentagon      | 0.910      | editorials    | 0.875      | efficiency        | 0.918      | 85  | essay         | 0.870      | emission     | 0.838      | contiguous        | 0.877      |
| 36                  | contiguous    | 0.909      | humanitys     | 0.875      | planet            | 0.917      | 86  | atmospheric   | 0.869      | ozone        | 0.837      | frequent          | 0.876      |
| 37                  | controlling   | 0.908      | eco           | 0.875      | curbing           | 0.917      | 87  | overheated    | 0.869      | pentagon     | 0.836      | sensible          | 0.874      |
| 38                  | carbon        | 0.907      | ton           | 0.874      | consumption       | 0.915      | 88  | copenhagen    | 0.869      | windstorms   | 0.836      | freely            | 0.872      |
| 39                  | dioxide       | 0.906      | efficient     | 0.872      | expands           | 0.914      | 89  | fahrenheit    | 0.868      | acceptance   | 0.836      | kerry             | 0.871      |
| 40                  | extremes      | 0.905      | cities        | 0.872      | subtler           | 0.913      | 90  | energy        | 0.868      | buildup      | 0.835      | ton               | 0.870      |
| 41                  | munich        | 0.903      | doom          | 0.870      | dimming           | 0.912      | 91  | adapt         | 0.868      | copenhagen   | 0.835      | fahrenheit        | 0.870      |
| 42                  | firing        | 0.902      | compounding   | 0.869      | talks             | 0.911      | 92  | windstorms    | 0.867      | focuses      | 0.835      | exemplified       | 0.869      |
| 43                  | subtler       | 0.902      | mentioning    | 0.868      | sparked           | 0.910      | 93  | funneling     | 0.867      | vein         | 0.834      | persistence       | 0.869      |
| 44                  | foretaste     | 0.900      | climate       | 0.868      | pentagon          | 0.909      | 94  | illustrative  | 0.866      | epa          | 0.834      | atmospheric       | 0.869      |
| 45                  | generating    | 0.899      | reducing      | 0.867      | eco               | 0.909      | 95  | vapor         | 0.866      | drought      | 0.833      | environmental     | 0.866      |
| 46                  | environmental | 0.899      | pressures     | 0.866      | adapt             | 0.909      | 96  | abundance     | 0.864      | harvard      | 0.832      | increasing        | 0.865      |
| 47                  | fossil        | 0.899      | arizona       | 0.864      | imperative        | 0.908      | 97  | prosperity    | 0.864      | redundant    | 0.832      | levi              | 0.865      |
| 48                  | deniers       | 0.898      | candlelit     | 0.863      | trapping          | 0.908      | 98  | freely        | 0.863      | greenhouse   | 0.829      | meaningfully      | 0.864      |
| 49                  | trapping      | 0.897      | dioxide       | 0.862      | cities            | 0.907      | 99  | emission      | 0.862      | temperature  | 0.827      | porous            | 0.863      |
| 50                  | skeptics      | 0.896      | degrees       | 0.862      | regulating        | 0.906      | 100 | scientific    | 0.862      | iron         | 0.826      | essay             | 0.862      |

**Table 7** A 30 topic LDA model for Hurricane Katrina. Each topic contains the 20 most probable (stemmed) words in its distribution. We stem words according to a Porter stemmer Porter (1980).

| Hurricane Katrina LDA |              |              |              |            |              |            |             |          |           |
|-----------------------|--------------|--------------|--------------|------------|--------------|------------|-------------|----------|-----------|
| topic 0               | topic 1      | topic 2      | topic 3      | topic 4    | topic 5      | topic 6    | topic 7     | topic 8  | topic 9   |
| quinn                 | leve         | job          | hous         | billion    | polic        | bush       | bodi        | price    | school    |
| team                  | corp         | hous         | water        | tax        | casino       | presid     | death       | oil      | student   |
| season                | engin        | krt          | home         | feder      | offic        | democrat   | offici      | percent  | univers   |
| time                  | flood        | st           | street       | hous       | peopl        | republican | state       | energi   | tulan     |
| player                | water        | home         | time         | senat      | street       | hous       | home        | gas      | colleg    |
| play                  | canal        | antoin       | day          | congress   | day          | polit      | die         | gasolin  | educ      |
| game                  | protect      | back         | peopl        | cut        | depart       | white      | victim      | rate     | back      |
| coach                 | wall         | school       | back         | republican | fire         | administr  | peopl       | market   | campus    |
| start                 | system       | restaur      | tree         | spend      | citi         | senat      | famili      | week     | return    |
| point                 | louisiana    | peopl        | live         | bill       | biloxi       | respons    | parish      | product  | high      |
| open                  | armi         | work         | boat         | budget     | hotel        | govern     | st          | month    | district  |
| make                  | offici       | month        | resid        | govern     | crime        | nation     | louisiana   | consum   | enrol     |
| made                  | surg         | worker       | work         | money      | store        | american   | identifi    | report   | public    |
| day                   | feet         | louisiana    | build        | program    | reddick      | time       | morgu       | economi  | class     |
| sign                  | project      | day          | neighborhood | state      | water        | leader     | relat       | compani  | warm      |
| top                   | level        | live         | damag        | propos     | time         | critic     | coron       | increas  | research  |
| week                  | pump         | chitrib      | roof         | cost       | back         | peopl      | dr          | gulf     | time      |
| score                 | lake         | rebuild      | photograph   | bush       | gambl        | iraq       | dead        | fuel     | hurrican  |
| world                 | design       | end          | flood        | plan       | mississippi  | parti      | found       | expect   | teacher   |
| lead                  | environment  | return       | photo        | million    | hous         | effort     | remain      | gallon   | institut  |
| topic 10              | topic 11     | topic 12     | topic 13     | topic 14   | topic 15     | topic 16   | topic 17    | topic 18 | topic 19  |
| peopl                 | leve         | red          | famili       | gras       | game         | music      | town        | peopl    | ship      |
| black                 | hous         | cross        | home         | mardi      | team         | jazz       | plan        | time     | airlin    |
| king                  | flood        | donat        | children     | french     | saint        | band       | build       | american | show      |
| time                  | protect      | relief       | day          | restaur    | play         | musician   | develop     | disast   | news      |
| west                  | rebuild      | organ        | live         | parad      | season       | art        | school      | news     | time      |
| mayor                 | home         | volunt       | back         | street     | home         | cultur     | hous        | report   | northrop  |
| day                   | system       | victim       | school       | back       | footbal      | museum     | state       | world    | network   |
| presid                | feder        | fund         | mother       | peopl      | player       | perform    | design      | stori    | travel    |
| polit                 | work         | peopl        | friend       | quarter    | coach        | play       | communiti   | book     | air       |
| bloomberg             | offici       | million      | peopl        | time       | state        | festiv     | resid       | nation   | nbc       |
| democrat              | peopl        | chariti      | im           | home       | time         | artist     | architect   | thing    | million   |
| campaign              | hotel        | disast       | call         | day        | leagu        | song       | board       | public   | broadcast |
| franklin              | state        | american     | hous         | citi       | stadium      | work       | meet        | word     | report    |
| candid                | neighborhood | money        | stay         | make       | giant        | show       | public      | natur    | abc       |
| ferrier               | engin        | group        | time         | club       | san          | time       | local       | day      | cruis     |
| poll                  | corp         | rais         | dont         | louisiana  | back         | concert    | street      | govern   | program   |
| hop                   | powel        | effort       | work         | cook       | bowl         | includ     | architectur | media    | film      |
| made                  | billion      | food         | life         | krew       | louisiana    | orchestra  | project     | great    | channel   |
| hip                   | busi         | org          | son          | hotel      | field        | event      | urban       | make     | televis   |
| dont                  | krt          | shelter      | left         | celebr     | win          | record     | peopl       | histori  | navi      |
| topic 20              | topic 21     | topic 22     | topic 23     | topic 24   | topic 25     | topic 26   | topic 27    | topic 28 | topic 29  |
| compani               | insur        | peopl        | hospit       | guard      | nagin        | evacu      | state       | hous     | fema      |
| busi                  | flood        | church       | patient      | nation     | neighborhood | water      | car         | evacue   | respons   |
| work                  | damag        | black        | health       | state      | resid        | peopl      | charg       | fema     | feder     |
| employe               | billion      | massachusett | medic        | militari   | black        | offici     | law         | peopl    | agenc     |
| million               | state        | state        | nurs         | troop      | mayor        | resid      | court       | offici   | brown     |
| contract              | compani      | poverti      | care         | offici     | louisiana    | vehicl     | home        | disast   | govern    |
| servic                | loss         | work         | dr           | bush       | rebuild      | rita       | investig    | houston  | emerg     |
| worker                | mississippi  | romney       | center       | unit       | white        | area       | offic       | feder    | secur     |
| bank                  | home         | poor         | doctor       | forc       | peopl        | elect      | attorney    | agenc    | offici    |
| custom                | homeown      | american     | peopl        | feder      | home         | coast      | lawyer      | hotel    | plan      |
| week                  | pay          | evacue       | evacu        | louisiana  | home         | state      | louisiana   | trailer  | homeland  |
| oper                  | claim        | servic       | state        | equip      | vote         | texa       | case        | famili   | hous      |
| port                  | cost         | communiti    | flu          | day        | hous         | center     | judg        | state    | depart    |
| system                | allstat      | job          | emerg        | effort     | area         | wind       | report      | shelter  | report    |
| execut                | area         | base         | staff        | relief     | flood        | emerg      | fraud       | emerg    | manag     |
| line                  | properti     | day          | home         | presid     | return       | gulf       | station     | live     | chertoff  |
| area                  | louisiana    | time         | day          | respons    | plan         | home       | feder       | month    | white     |
| damag                 | industri     | live         | die          | blanco     | percent      | day        | offici      | apart    | bush      |
| small                 | feder        | worker       | diseas       | disast     | lower        | houston    | file        | govern   | plan      |
| call                  | polic        | nation       | univers      | rescu      | landrieu     | mile       | system      | assist   | investig  |

**Table 8** A 20 topic LDA model for Hurricane Sandy. Each topic contains the 20 most probable words in its distribution. We stem words according to a Porter stemmer Porter (1980).

| Hurricane Sandy LDA |            |               |              |          |             |            |           |           |           |
|---------------------|------------|---------------|--------------|----------|-------------|------------|-----------|-----------|-----------|
| topic 0             | topic 1    | topic 2       | topic 3      | topic 4  | topic 5     | topic 6    | topic 7   | topic 8   | topic 9   |
| power               | obama      | climat        | hous         | school   | broadway    | park       | train     | hospit    | insur     |
| util                | romney     | flood         | home         | time     | street      | tree       | author    | home      | compani   |
| servic              | presid     | chang         | water        | fund     | theater     | boardwalk  | station   | patient   | percent   |
| compani             | campaign   | protect       | beach        | peopl    | time        | jersey     | line      | health    | sale      |
| author              | elect      | build         | car          | day      | work        | damag      | servic    | medic     | month     |
| electr              | state      | rise          | live         | student  | open        | fire       | tunnel    | nurs      | market    |
| island              | republican | sea           | flood        | children | perform     | seasid     | jersey    | evacu     | busi      |
| custom              | vote       | water         | peopl        | public   | peopl       | shore      | gas       | emerg     | increas   |
| state               | polit      | risk          | point        | famili   | day         | busi       | transport | center    | million   |
| system              | governor   | level         | fire         | american | show        | height     | power     | dr        | loss      |
| grid                | voter      | energi        | street       | red      | week        | summer     | damag     | peopl     | industri  |
| long                | day        | natur         | rockaway     | donat    | power       | town       | subway    | citi      | home      |
| verizon             | poll       | power         | back         | case     | run         | time       | street    | offici    | report    |
| nation              | democrat   | weather       | day          | work     | danc        | beach      | manhattan | resid     | expect    |
| work                | peopl      | develop       | insur        | cross    | play        | work       | offici    | island    | billion   |
| phone               | debat      | make          | damag        | govern   | light       | pier       | transit   | day       | rate      |
| commiss             | candid     | cost          | resid        | live     | night       | island     | long      | care      | week      |
| network             | presidenti | state         | work         | disast   | cancel      | stand      | system    | bird      | retail    |
| con                 | time       | plan          | famili       | parent   | halloween   | back       | day       | mayor     | consum    |
| edison              | nation     | surg          | neighborhood | relief   | close       | visit      | island    | mold      | claim     |
| topic 10            | topic 11   | topic 12      | topic 13     | topic 14 | topic 15    | topic 16   | topic 17  | topic 18  | topic 19  |
| museum              | hous       | wind          | show         | peopl    | concert     | feder      | water     | beach     | build     |
| art                 | water      | power         | time         | home     | perform     | billion    | system    | sand      | street    |
| work                | peopl      | day           | stewart      | live     | ticket      | state      | state     | island    | develop   |
| galleri             | build      | close         | peopl        | hous     | music       | hous       | million   | park      | apart     |
| water               | resid      | weather       | make         | water    | show        | aid        | flood     | dune      | properti  |
| street              | home       | coast         | photo        | hotel    | million     | disast     | plant     | long      | million   |
| damag               | volunt     | expect        | live         | day      | money       | money      | cost      | offici    | floor     |
| flood               | food       | servic        | twitter      | polic    | benefit     | program    | car       | rockaway  | estat     |
| space               | day        | travel        | call         | work     | hall        | damag      | occupi    | corp      | water     |
| center              | work       | area          | work         | resid    | rais        | govern     | sewag     | project   | manhattan |
| compani             | power      | offici        | news         | famili   | song        | republican | river     | debri     | flood     |
| build               | live       | peopl         | stori        | apart    | peopl       | jersey     | peopl     | town      | resid     |
| seaport             | red        | state         | includ       | time     | night       | million    | dutch     | home      | real      |
| includ              | island     | damag         | inform       | island   | work        | congress   | project   | resid     | owner     |
| insur               | apart      | flood         | magazin      | door     | relief      | cuomo      | build     | communiti | squar     |
| offic               | week       | nation        | photograph   | evacu    | refund      | senat      | geotherm  | sea       | damag     |
| artist              | street     | massachusetts | design       | call     | springsteen | insur      | work      | day       | tenant    |
| aquarium            | heat       | center        | post         | worker   | jersey      | cost       | park      | boardwalk | month     |
| site                | brooklyn   | report        | print        | staten   | sale        | offici     | area      | public    | feet      |
| research            | hook       | hour          | page         | report   | band        | homeown    | engin     | work      | move      |

**Table 9** A 100 word extension of selected topics from the Sandy and Katrina LDA models.

| Sandy Topic 0 |          |     |           | Sandy Topic 2 |               |     |           | Katrina Topic 8 |           |     |           |
|---------------|----------|-----|-----------|---------------|---------------|-----|-----------|-----------------|-----------|-----|-----------|
| 1             | power    | 51  | generat   | 1             | climat        | 51  | coastal   | 1               | price     | 51  | drop      |
| 2             | util     | 52  | solar     | 2             | flood         | 52  | bloomberg | 2               | oil       | 52  | reserv    |
| 3             | servic   | 53  | spokesman | 3             | chang         | 53  | public    | 3               | percent   | 53  | close     |
| 4             | compani  | 54  | voic      | 4             | protect       | 54  | barrier   | 4               | energi    | 54  | inflat    |
| 5             | author   | 55  | energi    | 5             | build         | 55  | part      | 5               | gas       | 55  | spend     |
| 6             | electr   | 56  | manag     | 6             | rise          | 56  | elev      | 6               | gasolin   | 56  | refin     |
| 7             | island   | 57  | emerg     | 7             | sea           | 57  | presid    | 7               | rate      | 57  | august    |
| 8             | custom   | 58  | liberti   | 8             | water         | 58  | system    | 8               | market    | 58  | depart    |
| 9             | state    | 59  | local     | 9             | risk          | 59  | map       | 9               | week      | 59  | natur     |
| 10            | system   | 60  | respons   | 10            | level         | 60  | gas       | 10              | product   | 60  | chief     |
| 11            | grid     | 61  | governor  | 11            | energi        | 61  | vulner    | 11              | month     | 61  | job       |
| 12            | long     | 62  | prepar    | 12            | natur         | 62  | disast    | 12              | consum    | 62  | end       |
| 13            | verizon  | 63  | feder     | 13            | power         | 63  | peopl     | 13              | report    | 63  | septemb   |
| 14            | nation   | 64  | copper    | 14            | weather       | 64  | fuel      | 14              | economi   | 64  | profit    |
| 15            | work     | 65  | govern    | 15            | develop       | 65  | event     | 15              | compani   | 65  | feder     |
| 16            | phone    | 66  | rate      | 16            | make          | 66  | polici    | 16              | increas   | 66  | gain      |
| 17            | commiss  | 67  | problem   | 17            | cost          | 67  | step      | 17              | gulf      | 67  | retail    |
| 18            | network  | 68  | regul     | 18            | state         | 68  | zone      | 18              | fuel      | 68  | record    |
| 19            | con      | 69  | link      | 19            | plan          | 69  | damag     | 19              | expect    | 69  | interest  |
| 20            | edison   | 70  | cost      | 20            | surg          | 70  | live      | 20              | gallon    | 70  | damag     |
| 21            | day      | 71  | percent   | 21            | nation        | 71  | effect    | 21              | cent      | 71  | share     |
| 22            | restor   | 72  | backup    | 22            | warm          | 72  | unit      | 22              | barrel    | 72  | rais      |
| 23            | public   | 73  | report    | 23            | infrastructur | 73  | coast     | 23              | higher    | 73  | term      |
| 24            | communic | 74  | investig  | 24            | global        | 74  | research  | 24              | stock     | 74  | demand    |
| 25            | million  | 75  | damag     | 25            | increas       | 75  | agenc     | 25              | economist | 75  | futur     |
| 26            | worker   | 76  | chief     | 26            | citi          | 76  | recent    | 26              | quarter   | 76  | billion   |
| 27            | execut   | 77  | elli      | 27            | reduc         | 77  | long      | 27              | econom    | 77  | level     |
| 28            | cuomo    | 78  | ed        | 28            | carbon        | 78  | generat   | 28              | high      | 78  | declin    |
| 29            | offici   | 79  | wireless  | 29            | environment   | 79  | heat      | 29              | cost      | 79  | hit       |
| 30            | employe  | 80  | carrier   | 30            | scientist     | 80  | effort    | 30              | suppli    | 80  | investor  |
| 31            | batteri  | 81  | presid    | 31            | billion       | 81  | rais      | 31              | day       | 81  | survey    |
| 32            | offic    | 82  | hit       | 32            | engin         | 82  | pollut    | 32              | analyst   | 82  | state     |
| 33            | oper     | 83  | counti    | 33            | studi         | 83  | industri  | 33              | refineri  | 83  | remain    |
| 34            | week     | 84  | general   | 34            | time          | 84  | project   | 34              | nation    | 84  | effect    |
| 35            | call     | 85  | consum    | 35            | resili        | 85  | standard  | 35              | industri  | 85  | hurrican  |
| 36            | time     | 86  | consolid  | 36            | futur         | 86  | code      | 36              | time      | 86  | impact    |
| 37            | charg    | 87  | equip     | 37            | emiss         | 87  | hit       | 37              | rose      | 87  | heat      |
| 38            | provid   | 88  | director  | 38            | area          | 88  | issu      | 38              | point     | 88  | credit    |
| 39            | plan     | 89  | issu      | 39            | govern        | 89  | ocean     | 39              | rise      | 89  | labor     |
| 40            | includ   | 90  | cabl      | 40            | feet          | 90  | oyster    | 40              | fell      | 90  | servic    |
| 41            | pay      | 91  | critic    | 41            | requir        | 91  | design    | 41              | fed       | 91  | american  |
| 42            | wire     | 92  | cellphon  | 42            | higher        | 92  | larg      | 42              | averag    | 92  | continu   |
| 43            | statu    | 93  | technolog | 43            | mayor         | 93  | offici    | 43              | trade     | 93  | unit      |
| 44            | failur   | 94  | run       | 44            | extrem        | 94  | warn      | 44              | million   | 94  | show      |
| 45            | home     | 95  | caus      | 45            | propos        | 95  | face      | 45              | growth    | 95  | produc    |
| 46            | line     | 96  | telephon  | 46            | high          | 96  | east      | 46              | index     | 96  | note      |
| 47            | board    | 97  | substat   | 47            | plant         | 97  | sever     | 47              | yesterday | 97  | petroleum |
| 48            | panel    | 98  | guard     | 48            | includ        | 98  | univers   | 48              | sale      | 98  | earn      |
| 49            | hour     | 99  | place     | 49            | insur         | 99  | decad     | 49              | crude     | 99  | concern   |
| 50            | area     | 100 | chairman  | 50            | world         | 100 | solut     | 50              | coast     | 100 | import    |
